# Supplementary material for: Indicators of dependence and efforts to quit vaping and smoking among youth in Canada, England and the USA
Source: HighWire-hosted journal article supplement (doi:10.1136/tobaccocontrol-2020-056269), 2021-02-01
Supplement: tobaccocontrol-2020-056269supp001_data_supplement.pdf [file tobaccocontrol-2020-056269supp001_data_supplement.pdf]

**Supplemental Table 1: Indicators of perceived vaping and cigarette smoking dependence among past 30-day users, 2017 to 2019, by country, weighted % (n)**

|                                                                                              | CANADA     |            |            | ENGLAND    |            |            | US         |            |            |
|----------------------------------------------------------------------------------------------|------------|------------|------------|------------|------------|------------|------------|------------|------------|
|                                                                                              | 2017       | 2018       | 2019       | 2017       | 2018       | 2019       | 2017       | 2018       | 2019       |
| <b>VAPING</b>                                                                                | (n=340)    | (n=463)    | (n=738)    | (n=347)    | (n=351)    | (n=439)    | (n=454)    | (n=635)    | (n=736)    |
| <b>In the past 30 days, how often did you have a strong urge to use an e-cigarette/vape?</b> |            |            |            |            |            |            |            |            |            |
| Several times a day                                                                          | 13.5 (46)  | 9.7 (45)   | 18.7 (137) | 10.3 (35)  | 12.3 (43)  | 9.5 (42)   | 15.7 (71)  | 15.9 (101) | 21.9 (161) |
| Every day or most days                                                                       | 11.8 (40)  | 14.0 (64)  | 15.9 (116) | 14.0 (48)  | 17.9 (63)  | 22.4 (98)  | 15.4 (70)  | 20.7 (131) | 22.7 (166) |
| At least once a week                                                                         | 16.1 (55)  | 13.4 (62)  | 19.9 (145) | 15.2 (52)  | 17.2 (60)  | 18.3 (80)  | 19.7 (89)  | 20.7 (131) | 19.6 (143) |
| Less than once a week                                                                        | 12.0 (40)  | 13.4 (62)  | 11.6 (85)  | 8.6 (30)   | 10.6 (37)  | 13.2 (58)  | 14.0 (64)  | 11.7 (74)  | 11.6 (85)  |
| Never                                                                                        | 42.4 (143) | 47.2 (217) | 32.1 (235) | 47.2 (162) | 39.6 (139) | 33.8 (148) | 33.5 (152) | 28.1 (178) | 20.8 (152) |
| Don't know                                                                                   | 4.1 (14)   | 2.2 (10)   | 1.8 (14)   | 4.6 (16)   | 2.5 (9)*   | 2.8 (12)   | 1.7 (8)*   | 2.9 (18)   | 3.4 (25)   |
| <b>Do you consider yourself addicted to using e-cigarettes/ vaping?</b>                      |            |            |            |            |            |            |            |            |            |
| Yes, very addicted                                                                           | 10.5 (35)  | 8.0 (37)   | 12.8 (94)  | 12.9 (44)  | 9.7 (34)   | 8.5 (37)   | 10.1 (46)  | 13.0 (83)  | 13.0 (95)  |
| Yes, a little addicted                                                                       | 21.8 (73)  | 21.0 (97)  | 34.4 (251) | 17.7 (61)  | 31.1 (109) | 30.4 (133) | 25.6 (116) | 28.9 (183) | 38.4 (282) |
| Not at all                                                                                   | 61.8 (208) | 68.2 (316) | 50.4 (369) | 61.0 (210) | 54.9 (192) | 58.1(254)  | 62.2 (282) | 56.0 (355) | 45.3 (333) |
| Don't know                                                                                   | 5.9 (20)   | 2.7 (13)   | 2.4 (18)   | 8.4 (29)   | 4.2 (15)   | 3.0 (13)   | 2.1 (9)    | 2.1 (13)   | 3.4 (25)   |
| <b>CIGARETTE SMOKING</b>                                                                     | (n=431)    | (n=383)    | (n=384)    | (n=622)    | (n=645)    | (n=519)    | (n=451)    | (n=470)    | (n=315)    |
| <b>In the past 30 days, how often did you have a strong urge to smoke a cigarette?</b>       |            |            |            |            |            |            |            |            |            |
| Several times a day                                                                          | 23.4 (101) | 22.2 (85)  | 20.1 (77)  | 14.7 (91)  | 18.7 (121) | 17.2 (89)  | 31.2 (141) | 26.2 (123) | 28.0 (88)  |
| Every day or most days                                                                       | 25.1 (108) | 27.4 (104) | 21.6 (82)  | 21.0 (130) | 25.9 (167) | 21.6 (112) | 26.8 (121) | 25.5 (120) | 30.8 (97)  |
| At least once a week                                                                         | 18.2 (79)  | 19.8 (75)  | 24.1 (92)  | 13.6 (84)  | 17.0 (110) | 18.7 (97)  | 15.2 (69)  | 22.8 (107) | 18.3 (58)  |
| Less than once a week                                                                        | 9.6 (41)   | 13.5 (51)  | 13.5 (52)  | 14.6 (90)  | 11.6 (75)  | 16.5 (86)  | 11.1 (50)  | 12.5 (59)  | 11.1 (35)  |
| Never                                                                                        | 22.2 (96)  | 16.1 (61)  | 19.7 (75)  | 34.3 (213) | 26.0 (168) | 25.1 (130) | 14.5 (65)  | 11.6 (55)  | 11.1 (35)  |
| Don't know                                                                                   | 1.4 (6)*   | 1.0 (4)*   | 0.8 (3)*   | 1.8 (11)   | 0.8 (5)*   | 0.8 (4)*   | 1.1 (5)*   | 1.4 (6)*   | 0.7 (2)*   |
| <b>Do you consider yourself addicted to cigarettes?</b>                                      |            |            |            |            |            |            |            |            |            |
| Yes, very addicted                                                                           | 18.1 (78)  | 23.9 (91)  | 19.9 (77)  | 11.7 (72)  | 14.6 (94)  | 14.3 (74)  | 14.1 (64)  | 18.4 (86)  | 18.7 (59)  |
| Yes, a little addicted                                                                       | 46.4 (200) | 38.6 (147) | 39.1(150)  | 31.2 (193) | 40.2 (259) | 39.6 (206) | 46.6 (210) | 45.6 (214) | 48.1 (152) |
| Not at all                                                                                   | 32.8 (141) | 35.9 (137) | 39.4 (152) | 54.3 (336) | 45.1 (291) | 44.6 (231) | 37.8 (171) | 34.2 (161) | 32.0 (101) |
| Don't know                                                                                   | 2.7 (12)*  | 1.6 (6)*   | 1.5 (6)*   | 2.9 (18)   | 0.1 (1)*   | 1.4 (7)*   | 1.5 (7)*   | 1.7 (8)*   | 1.2 (4)*   |

Note: Respondents replying "Refused" (<1.3% in every question) have been excluded from the cells of the table

\*High variability (coefficient of variation >33.3%); interpret with caution

**Supplemental Table 2: Indicators of perceived vaping and cigarette smoking dependence among past 30-day users, 2017 to 2019, by exclusive versus dual use and by country, weighted %**

|                  | 2017                     |        |                                  |        | 2018                     |        |                                  |        | 2019                     |        |                                  |        |
|------------------|--------------------------|--------|----------------------------------|--------|--------------------------|--------|----------------------------------|--------|--------------------------|--------|----------------------------------|--------|
|                  | URGE TO USE <sup>a</sup> |        | PERCEIVED ADDICTION <sup>b</sup> |        | URGE TO USE <sup>a</sup> |        | PERCEIVED ADDICTION <sup>b</sup> |        | URGE TO USE <sup>a</sup> |        | PERCEIVED ADDICTION <sup>b</sup> |        |
|                  | Smoking                  | Vaping | Smoking                          | Vaping | Smoking                  | Vaping | Smoking                          | Vaping | Smoking                  | Vaping | Smoking                          | Vaping |
| <b>CANADA</b>    |                          |        |                                  |        |                          |        |                                  |        |                          |        |                                  |        |
| Exclusive vaper  | -                        | 15.9%  | -                                | 19.8%  | -                        | 16.7%  | -                                | 20.9%  | -                        | 31.5%  | -                                | 43.3%  |
| Exclusive smoker | 52.2%                    | -      | 66.3%                            | -      | 48.6%                    | -      | 64.2%                            | -      | 42.3%                    | -      | 58.8%                            | -      |
| Dual user        | 44.3%                    | 38.5%  | 66.3%                            | 50.8%  | 51.7%                    | 36.3%  | 62.8%                            | 44.1%  | 41.9%                    | 43.8%  | 60.8%                            | 59.4%  |
| <b>US</b>        |                          |        |                                  |        |                          |        |                                  |        |                          |        |                                  |        |
| Exclusive vaper  | -                        | 15.9%  | -                                | 18.8%  | -                        | 25.8%  | -                                | 31.2%  | -                        | 41.0%  | -                                | 48.3%  |
| Exclusive smoker | 46.7%                    | -      | 55.0%                            | -      | 43.3%                    | -      | 59.5%                            | -      | 51.2%                    | -      | 62.1%                            | -      |
| Dual user        | 68.8%                    | 44.9%  | 67.1%                            | 52.1%  | 59.6%                    | 54.7%  | 69.7%                            | 59.2%  | 63.7%                    | 59.1%  | 70.6%                            | 65.6%  |
| <b>ENGLAND</b>   |                          |        |                                  |        |                          |        |                                  |        |                          |        |                                  |        |
| Exclusive vaper  | -                        | 18.8%  | -                                | 24.2%  | -                        | 19.6%  | -                                | 31.3%  | -                        | 25.9%  | -                                | 30.2%  |
| Exclusive smoker | 31.0%                    | -      | 35.8%                            | -      | 40.6%                    | -      | 48.6%                            | -      | 32.2%                    | -      | 48.5%                            | -      |
| Dual user        | 47.7%                    | 30.6%  | 61.6%                            | 40.1%  | 53.6%                    | 38.2%  | 67.4%                            | 49.8%  | 48.2%                    | 39.3%  | 62.7%                            | 49.6%  |

<sup>a</sup>Percentage reporting strong urges to use an e-cigarette/smoke “several times a day, or every day/most days”

<sup>b</sup>Percentage reporting they perceive themselves as “a little addicted” or “very addicted” to vaping/smoking.

Note: “Refused” and “Don’t know” responses excluded from denominators
